# Supplementary material for: Multifunctional Zn–carbon dots enhanced specific recognition and in situ degradation of tetracycline
Source: Royal Society of Chemistry journal article supplement (doi:10.1039/d4tc04306e), 2025-01-01
Supplement: d4tc04306e1.pdf [file d4tc04306e1.pdf]

## Supplementary Material

### **Multifunctional Zn-Carbon dots enhanced specific recognition and in-situ degradation of tetracycline**

Tianbao Liu<sup>a, b, †</sup>, Weixuan Zhao<sup>a, b, †</sup>, Shenhua Meng<sup>a</sup>, Biao Dong<sup>c</sup>, Nan Shi<sup>d, \*</sup> and Weiguang Shi<sup>a, b, \*</sup>

<sup>a</sup> State Key Laboratory of Continental Shale Oil, College of Chemistry & Chemical Engineering, Northeast Petroleum University, Daqing, 163318, China;

<sup>b</sup> Key Laboratory of Continental Shale Hydrocarbon Accumulation and Efficient Development, Ministry of Education, Northeast Petroleum University, Daqing, 163318, China;

<sup>c</sup> State Key Laboratory on Integrated Optoelectronics, College of Electronic Science and Engineering, Jilin University, Changchun 130012, China;

<sup>d</sup> Department of Respiratory Medicine, No. 964 Hospital of People's Liberation Army, 4799 Xi'an Road, Changchun 130062, China

† These authors contributed equally to this work and should be considered co-first authors.

\* Correspondence: [sswwgg2003@126.com](mailto:sswwgg2003@126.com); [1350432785@163.com](mailto:1350432785@163.com)

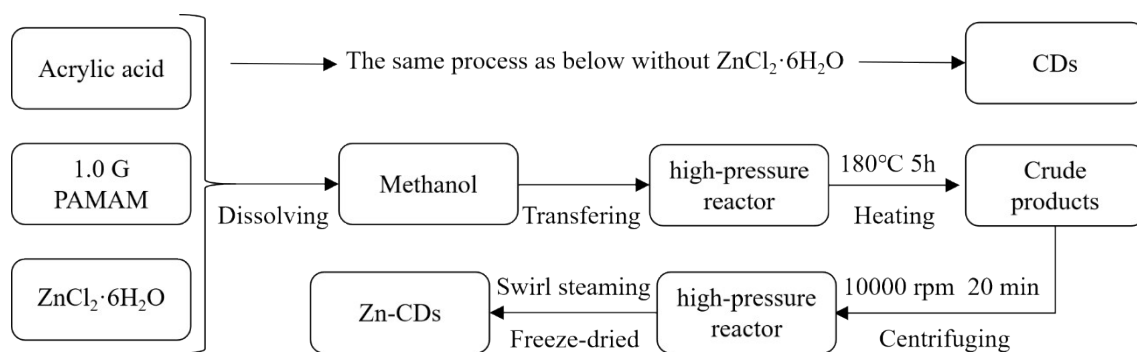

Figure S1. Synthesis flow chart of Zn-CDs.

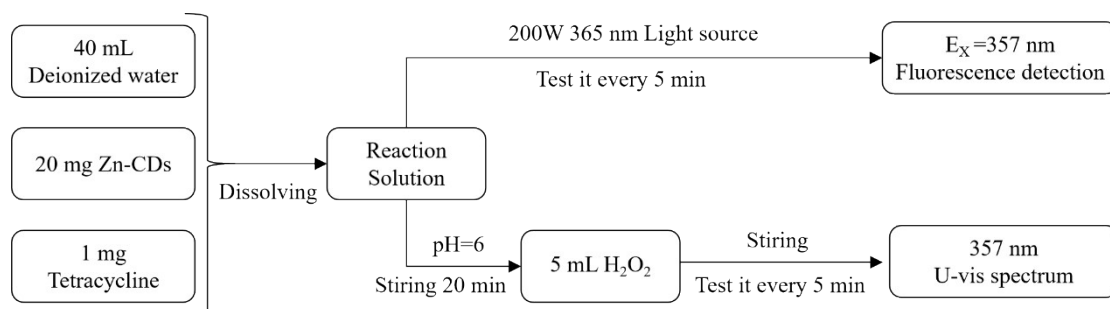

Figure S2. The flow chart of Zn-CDs for photocatalytic and Fenton-like degradation of tetracycline.

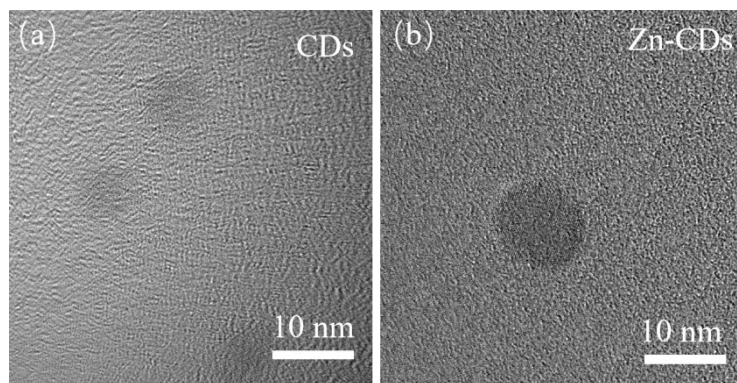

Figure S3. TEM (a) CDs, (b) Zn-CDs

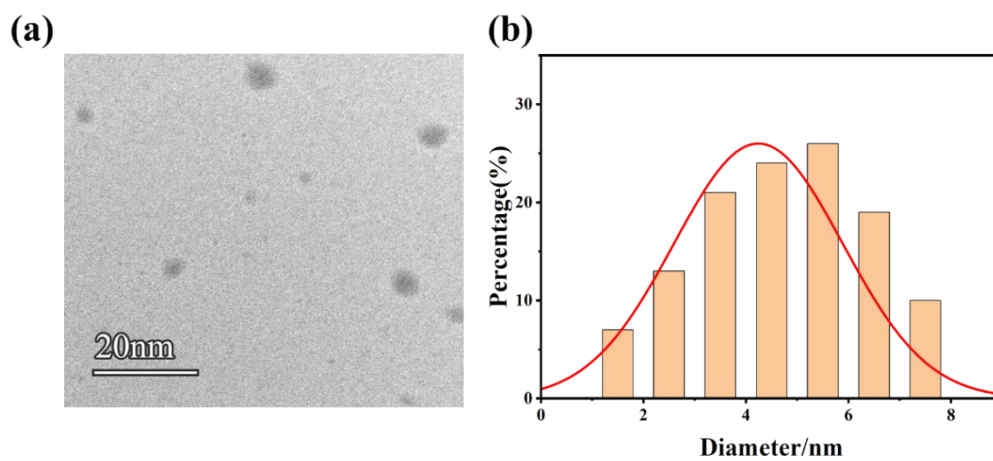

Figure S4. CDs (a) TEM of CDs, (b) Particle size distribution histogram of CDs.

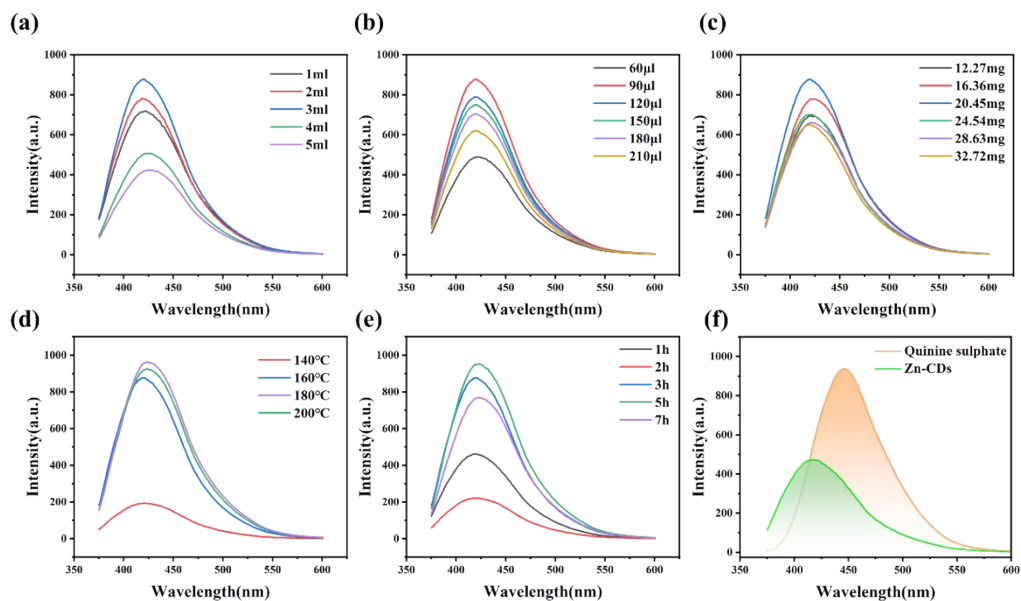

Figure S5. The influence factors of fluorescence properties for Zn-CDs: (a) The concentration of 1.0 G PAMAM; (b) The concentration of acrylic acid; (c) The concentration of ZnCl<sub>2</sub>. The influence of reaction conditions on the Zn-CDs fluorescence intensity: (d) Temperature; (e) Time. (f) Comparison of fluorescence intensity between Zn-CDs and quinine sulfate standard QY samples.

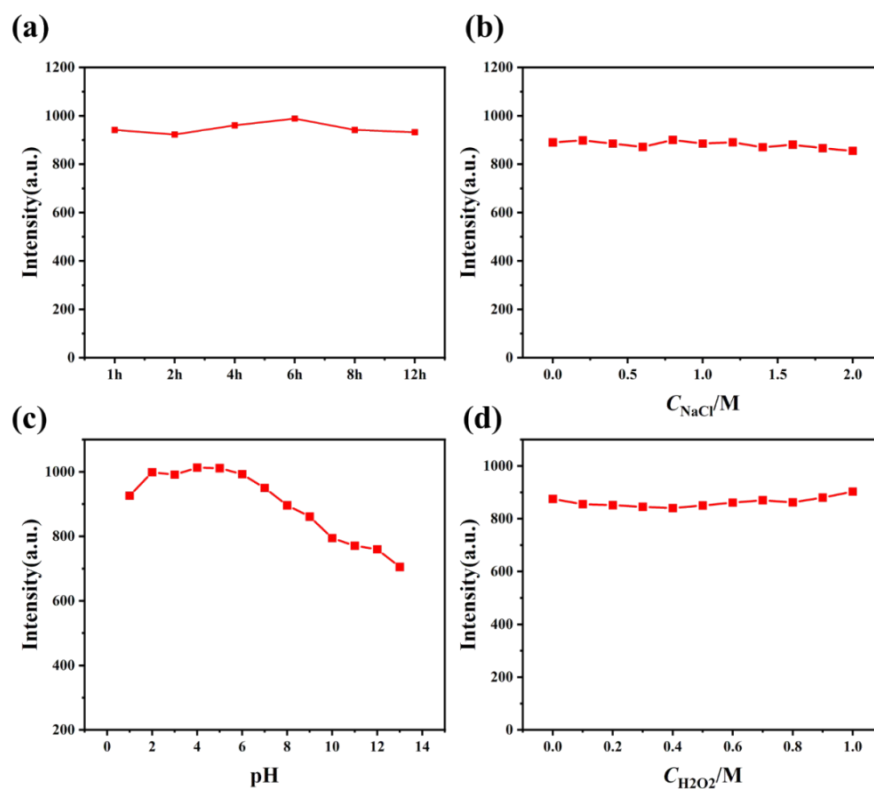

Figure S6. The fluorescence emission intensity of Zn-CDs varies under different environments (a)

ultraviolet irradiation time, (b) NaCl concentrations, (c) pH, and (d) H<sub>2</sub>O<sub>2</sub> concentrations.

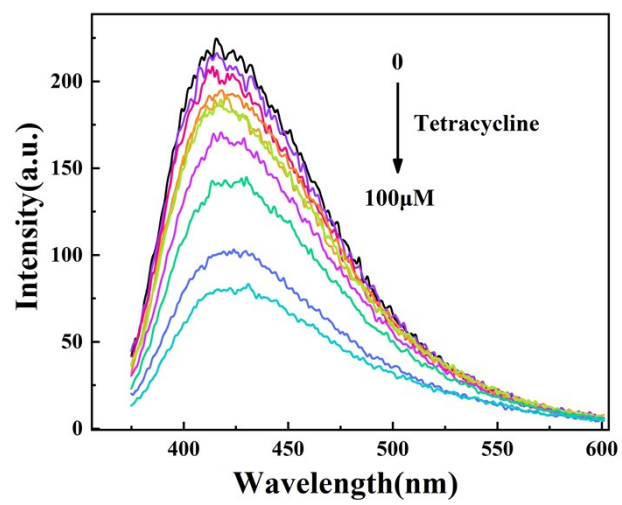

Figure S7. Recognition of tetracycline by pure carbon dots.

**Table S1. Comparison of fluorescence detection of Zn-CDs for tetracycline**

| Name of CDs | Detection limit | Quantum yield | Reference |
|-------------|-----------------|---------------|-----------|
| N-CQDs      | 60 nM           | 18 %          | S[1]      |
| N-CQDs      | 0.34 $\mu$ M    | 10.97%        | S[2]      |
| F -CQD      | 85 nM           | 39%           | S[3]      |
| CQDs@MSNs   | 5.19 $\mu$ M    | /             | S[4]      |
| Zn-CDs      | 25 nM           | 28.6%         | This work |

S[1] John B K, John N, Korah B K, et al. Nitrogen-doped carbon quantum dots as a highly selective fluorescent and electrochemical sensor for tetracycline[J]. *Journal of Photochemistry and Photobiology A: Chemistry*, 2022, **432**, 114060.

S[2] Wang C, Sun Q, Yang M, et al. Preparation of highly luminescent nitrogen-doped carbon quantum dots and their detection of tetracycline antibiotics[J]. *Colloids and Surfaces A: Physicochemical and Engineering Aspects*, 2022, **653**, 129982.

S[3] Huang Y, Huang X, Lin H, et al. Room temperature driven highly crystalline fluorine-doped carbon quantum dots for sensitive tetracycline sensing[J]. *Optical Materials*, 2021, **114**, 110967.

S[4] Lu P, Hou X, Lu G A, et al. Determination of tetracycline by FRET fluorescence between chenpi carbon quantum dots and copper nanoparticles[J]. *Chinese Journal of Analytical Chemistry*, 2024, **52**(10), 100440.

**Table S2. Composition List of Lake Water <sup>a</sup>**

| <b>Item</b>      | <b>Value <sup>b</sup></b> | <b>Item</b>        | <b>Value <sup>b</sup></b> |
|------------------|---------------------------|--------------------|---------------------------|
| pH               | 8.60                      | Dissolved oxygen   | 6.9 mg/L                  |
| Pb <sup>2+</sup> | 0.001 mg/ L               | Permanganate       | 8.1 mg/ L                 |
| Cu <sup>2+</sup> | 0.01 mg/ L                | Total N            | 4.31 mg/ L                |
| Zn <sup>2+</sup> | 0.05 mg/ L                | NH <sub>3</sub> -N | 1.35 mg/ L                |
| Hg <sup>2+</sup> | 0 mg/ L                   | Total F            | 1.29 mg/L                 |
| Cd <sup>2+</sup> | 0.001 mg/ L               | Cyanide            | 0.004 mg/ L               |
| Cr <sup>6+</sup> | 0.004 mg/ L               | Volatile phenol    | 0.001 mg/ L               |
| Total As         | 0.0003 mg/ L              | Sulfide            | 0.01 mg/ L                |
| Total Se         | 0.0004 mg/ L              | Fecal coliforms    | 400/ L                    |
| Total P          | 0.62 mg/ L                |                    |                           |

<sup>a</sup> The data were obtained from the Daqing Ecological Environment Monitoring Center in 2023.

<sup>b</sup> The data for each item represents the average of the measured values.



**Table S3. Comparison of tetracycline detection performance with fluorescence detection materials**

|                    | Linear range        | LOD          | Application              | Literature |
|--------------------|---------------------|--------------|--------------------------|------------|
| <b>Atta-CDs-Eu</b> | 0.05 ~ 20 $\mu$ M   | 8.7 nM       | Milk                     | S[5]       |
| <b>Cu-CDs</b>      | 2 ~ 32 $\mu$ M      | 0.17 $\mu$ M | Antibiotic tablets, Milk | S[6]       |
| <b>R-CDs</b>       | 3 ~ 40 $\mu$ M      | 38.5 nM      | Milk                     | S[7]       |
| <b>Zn-CDs</b>      | 50 nM ~ 100 $\mu$ M | 25 nM        | Tap water, Lake water    | this work  |

S[5] Y. Sang; Wang, K.; Kong, X.; Cheng, F.; Zhou, C.; Li, W., Color-multiplexing europium doped carbon dots for highly selective and dosage-sensitive cascade visualization of tetracycline and  $Al^{3+}$ . *Sensors and Actuators B: Chemical*. 2022, **362**, 131780.

S[6] J. Guo; Lu, W.; Zhang, H.; Meng, Y.; Du, F.; Shuang, S.; Dong, C., Copper doped carbon dots as the multi-functional fluorescent sensing platform for tetracyclines and pH. *Sensors and Actuators B: Chemical*, 2021, **330**, 129360.

S[7] B. Wang; Gu, C.; Jiao, Y.; Gao, Y.; Liu, X.; Guo, J.; Qian, T., Novel preparation of red fluorescent carbon dots for tetracycline sensing and its application in trace determination. *Talanta*, 2023, **253**, 123975.
